# Supplementary material for: Suprapubic lipectomy with tacking of the penis to the pubic bone and its effect on penile length
Source: Research Square preprint supplement (doi:10.21203/rs.3.rs-3193205/v1), 2023-08-01
Supplement: Supplementary file 1 [file 4028304f82ea8da8360b3802.xlsx]

## Sheet: Sheet1
Table (1)	Mean	Standard Deviation	Median	Minimum	Maximum
Age	39.25	7.81	41	25	55
BMI	26.56	3.66	26.8	21.1	32.3
