# Supplementary material for: Suprapubic lipectomy with tacking of the penis to the pubic bone and its effect on penile length
Source: Research Square preprint supplement (doi:10.21203/rs.3.rs-3193205/v1), 2023-08-01
Supplement: Supplementary file 2 [file b4840cfbc13564f4e6a1482b.xlsx]

## Sheet: Sheet1
Table (2)	Mean	Standard Deviation	Median	Minimum	Maximum
Pre-op. flaccid Length	4.39	1.463	4.25	2	8
Post-op. flaccid on table	8.76	1.626	8.5	5	14
3 months Post-op. flaccid length	8.95	1.85	8.7	6.3	14.2
