# Supplementary material for: Suprapubic lipectomy with tacking of the penis to the pubic bone and its effect on penile length
Source: Research Square preprint supplement (doi:10.21203/rs.3.rs-3193205/v1), 2023-08-01
Supplement: Supplementary file 3 [file d68df53473dd3d34225d0bd2.xlsx]

## Sheet: Sheet1
Table (3)	Mean	Standard Deviation	Median	Minimum	Maximum
Pre-op. stretched length	6.26	2.27	10.4	7.5	14.8
Post-op. stretched length on table	9.87	2.39	12	8.8	16.4
3 months Post-op. stretched length	12.75	2.37	12.55	9.4	17.1
